# Supplementary material for: Dehydrogenation of ammonia borane through the third equivalent of hydrogen
Source: Royal Society of Chemistry journal article supplement (doi:10.1039/c6dt00604c), 2016-01-01
Supplement: c6dt00604c1.pdf [file c6dt00604c1.pdf]

## Supplementary Information

### Dehydrogenation of Ammonia Borane through the Third Equivalent of Hydrogen

Xingyue Zhang, Lisa Kam, and Travis J. Williams\*

Donald P. and Katherine B. Loker Hydrocarbon Research Institute and  
Department of Chemistry, University of Southern California,  
Los Angeles, California, 90089-1661  
travisw@usc.edu

#### Table of Contents

|                                                                                                       |           |
|-------------------------------------------------------------------------------------------------------|-----------|
| <b>I. Synthesis of 1 and Related Compounds .....</b>                                                  | <b>2</b>  |
| <b>II. Kinetic Profiles of 1 Catalyzed AB Dehydrogenation via <math>^{11}\text{B}</math> NMR.....</b> | <b>5</b>  |
| <b>III. Control Reactions of 1 with Borazine.....</b>                                                 | <b>8</b>  |
| <b>IV. Representative <math>^{11}\text{B}</math> Spectra of AB Dehydrogenations .....</b>             | <b>9</b>  |
| <b>V. Eudiometry .....</b>                                                                            | <b>12</b> |
| <b>VI. References .....</b>                                                                           | <b>14</b> |

## I. Synthesis of 1 and Related Compounds

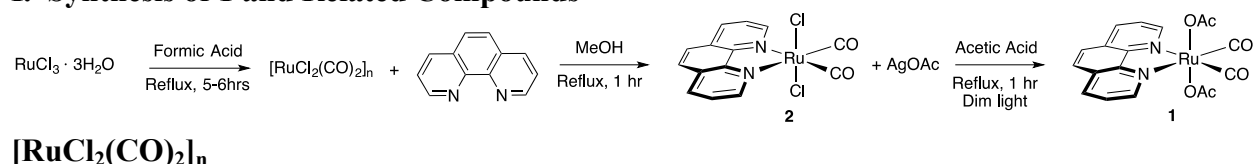

### [RuCl<sub>2</sub>(CO)<sub>2</sub>]<sub>n</sub>

Following a modified Krishnamurthy and Shashikala's synthetic procedure,<sup>1</sup> rutheniumdichlorodicarbonyl polymer was synthesized by adding RuCl<sub>3</sub>•3H<sub>2</sub>O (500 mg, 1.91 mmol, 1 equiv.) to a round bottom flask with a stir bar. Formic acid 97% (4 mL, 103 mmol, 53 equiv.) was added to the flask and a reflux condenser was added to the apparatus with a nitrogen line fitted to the top of the condenser. Ice water was recycled through the condenser from a bucket with a water pump. The initially black/red reaction mixture was refluxed in an oil bath for 5-6 hours when the reaction turns a light yellow. The reaction mixture was allowed to cool to room temperature then sealed and refrigerated overnight to allow the polymerization to approach completion. The formic acid was removed via a vacuum line and oil bath set at 70°C. The resulting light yellow residue was dried on the schlenk line overnight to remove residual solvent. The residue was then washed with hexanes (5 mL) and filtered to obtain a light yellow powder in 85% yield (371mg). FTIR (ν, cm<sup>-1</sup>): 2098.03, 2033.35 (M – CO's). 2140 is an often seen side product of [Ru(CO)<sub>3</sub>Cl<sub>2</sub>]<sub>2</sub>. The polymer is used without further purification through the subsequent reactions.

## **[(phen)RuCl<sub>2</sub>(CO)<sub>2</sub>] (2)**

Following a modified Thomas et. al.'s synthetic procedure,<sup>2</sup> phenanthroline-rutheniumdichlorodicarbonyl was synthesized by adding [RuCl<sub>2</sub>(CO)<sub>2</sub>]<sub>n</sub> (250 mg, 1.1 mmol, 1 equiv.) to a round bottom flask with a stirbar. 1,10-phenanthroline (212 mg, 1.1 mmol, 1 equiv.) was added to the flask. MeOH (25 mL) was added to the flask and a reflux condenser was added to the apparatus with a nitrogen line fitted to the top of the condenser. Ice water was recycled through the condenser from a bucket with a water pump. The initially light yellow reaction mixture was refluxed in an oil bath for 1 hour until the reaction turns into a lemon yellow. The reaction was allowed to cool to room temperature then the mixture was filtered. The yellow powder was dried on a vacuum line overnight to remove residual solvent and yielded 66% yield (295 mg). Note: This compound is light sensitive in solution.

<sup>1</sup>H NMR (400 MHz, Chloroform-*d*) δ 9.53 (dd, *J* = 5.1, 1.4 Hz, 2H), 8.60 (dd, *J* = 8.3, 1.4 Hz, 2H), 8.07 (s, 2H), 7.99 (dd, *J* = 8.2, 5.1 Hz, 2H).

FTIR (ν, cm<sup>-1</sup>): 2062.03, 2011.93 (M – CO's).

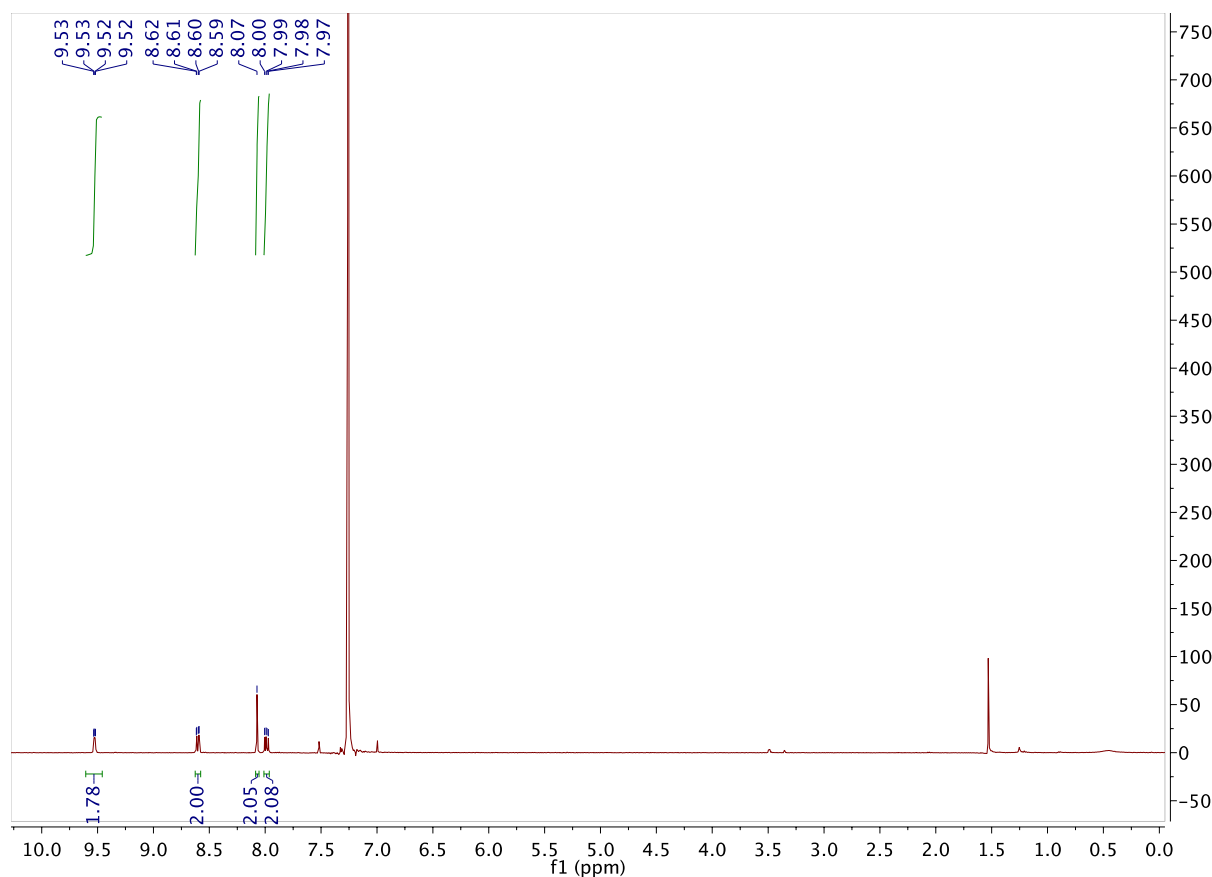

**Figure S1:** <sup>1</sup>H spectra of [(phen)RuCl<sub>2</sub>(CO)<sub>2</sub>], (2).

## **$[(\text{phen})\text{Ru}(\text{OAc})_2(\text{CO})_2]$ (**1**)**

Following a modified Thomas et. al.'s synthetic procedure, phenrutheniumdiacetatedicarbonyl was synthesized by adding  $[(\text{phen})\text{RuCl}_2(\text{CO})_2]$  (295 mg, 0.72 mmol, 1 equiv.) to a round bottom flask with a stir bar. Silver acetate (242 mg, 1.45 mmol, 2 equiv.) was added to the flask. Acetic acid (8 mL) was added to the flask and the round bottom flask was wrapped in aluminum foil. A reflux condenser was added to the apparatus with a nitrogen line fitted to the top of the condenser. Ice water was recycled through the condenser from a bucket with a water pump. The initially grey/yellow reaction mixture was refluxed in an oil bath for 1 hour. The reaction was allowed to cool to room temperature then the mixture was filtered. The filtrate was collected and all solvent was removed in vacuo. The yellow residue was dried on a vacuum line overnight to remove residual solvent. A minimum volume of hot MeOH was added to the residue and the product was recrystallized in MeOH overnight yielding yellow crystals in 62% yield (203 mg). Note: This compound is light sensitive in solution.

$^1\text{H}$  NMR (400 MHz, Chloroform-*d*)  $\delta$  9.76 (dd,  $J = 5.1, 1.4$  Hz, 2H), 8.57 (dd,  $J = 8.3, 1.4$  Hz, 2H), 8.05 (s, 2H), 7.94 (dd,  $J = 8.3, 5.1$  Hz, 2H), 1.58 (s, 6H).

FTIR (v,  $\text{cm}^{-1}$ ): 2057.48, 1990.73 (M – CO's).

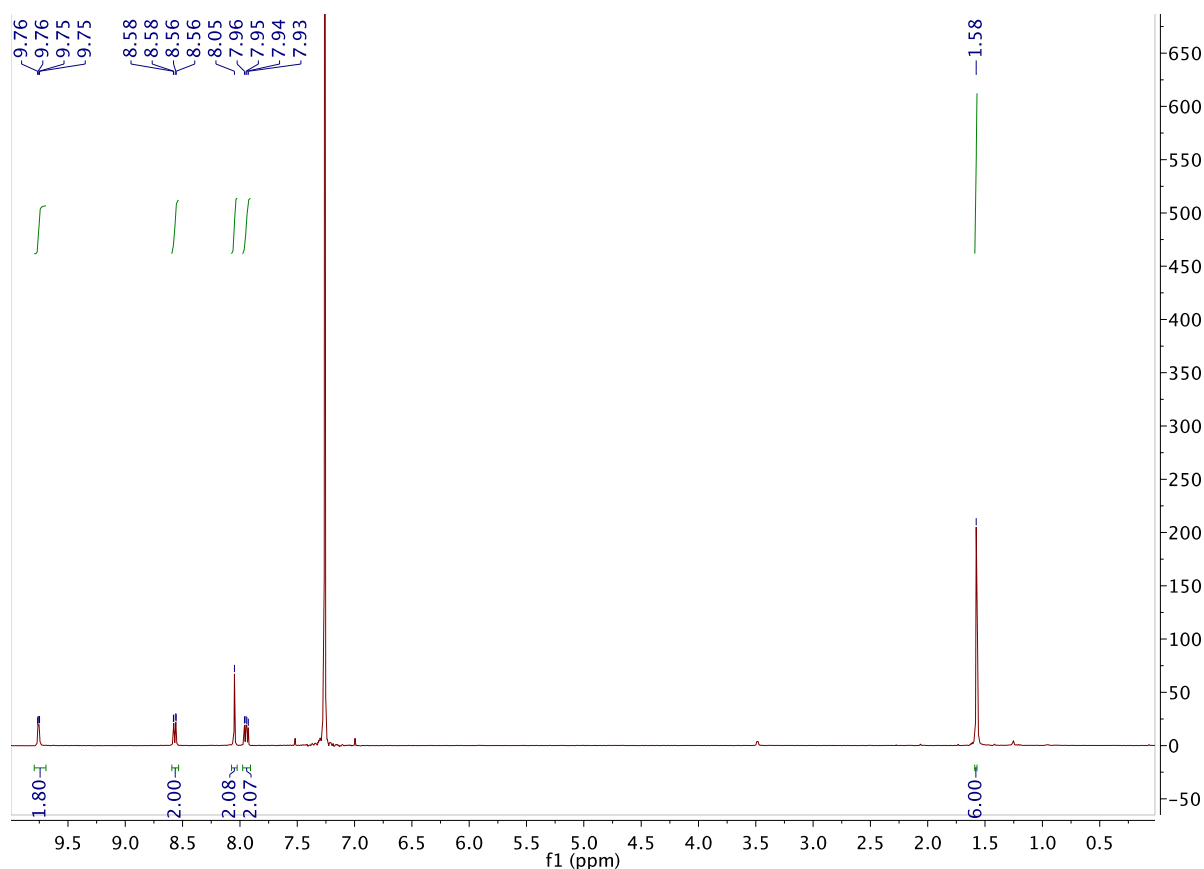

**Figure S2:**  $^1\text{H}$  spectra of  $[(\text{phen})\text{Ru}(\text{OAc})_2(\text{CO})_2]$ , **1**.

## II. Kinetic Profiles of **1** Catalyzed AB Dehydrogenation via $^{11}\text{B}$ NMR

### A. Kinetics for AB dehydrogenation by **1** at 1 mol% catalyst loading

**1**-catalyzed AB dehydrogenation run at 70 °C was determined using  $^{11}\text{B}$  NMR with 7.7 mg AB (0.25 mmol) and **1** (1.2 mg, 2.5  $\mu\text{mol}$ , 1 mol%) in diglyme (0.4 mL) and benzene- $d_6$  (0.2 mL).

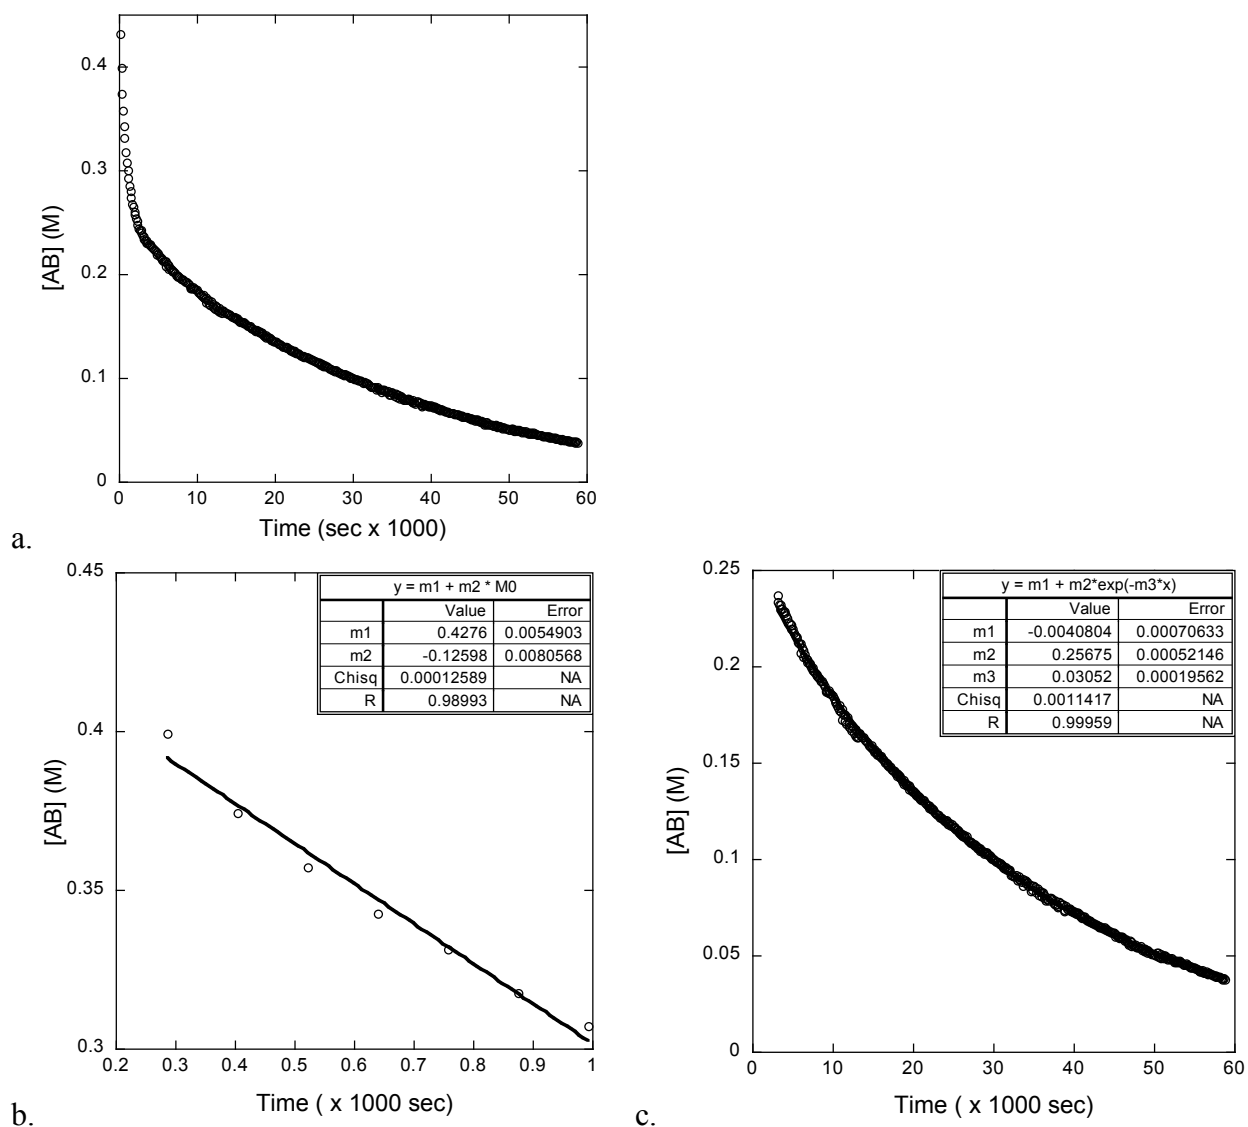

**Figure S3:** Kinetics for AB dehydrogenation catalyzed by **1**. (a). Entirety of graph. (b) Fast portion of dehydrogenation fitted linearly. (c) Slow portion of reaction fitted to exponential decay equation. The entirety of the kinetic profile does not fit exponential decay, thus it is split into a linear and an exponential portion for easier rate comparisons with air and water exposure experiments.

### B. Kinetics for Hg drop test in AB dehydrogenation catalyzed by **1** at 10 mol% catalyst loading

**1**-catalyzed AB dehydrogenation run at 70 °C was determined using  $^{11}\text{B}$  NMR with 7.7 mg AB (0.25 mmol) and **1** (12.0 mg, 25  $\mu\text{mol}$ , 10 mol%) in diglyme (0.4 mL) and benzene- $d_6$  (0.2 mL). In the run with Hg, ca. 100  $\mu\text{L}$  of Hg were added.

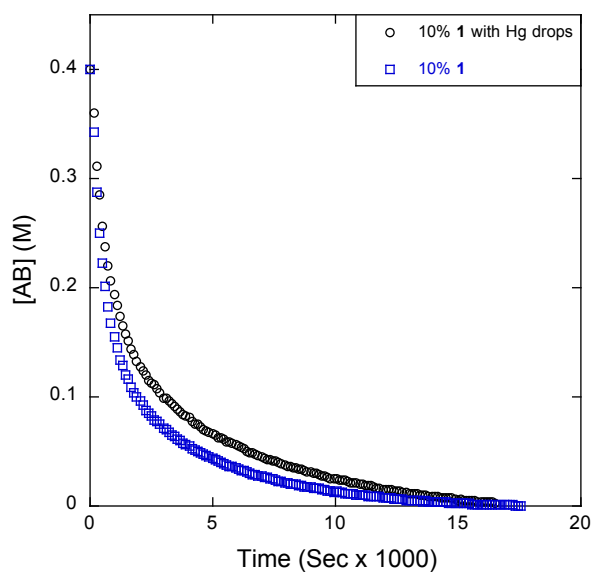

**Figure S4:** Kinetics for AB dehydrogenation catalyzed by **1** with Hg (black circles) and without (blue squares).

### C. Kinetics for AB dehydrogenation catalyzed by **1** after **1**'s exposure to air and water

**1**-catalyzed AB dehydrogenation run at 70 °C was determined using  $^{11}\text{B}$  NMR after **1** (1.2 mg, 2.5  $\mu\text{mol}$ , 1 mol%) in diglyme (0.4 mL) and benzene- $d_6$  (0.2 mL) was submerged in an ultrasonic cleaning bath for 20 minutes open to air, and then the addition of 7.7 mg of AB (0.25mmol).

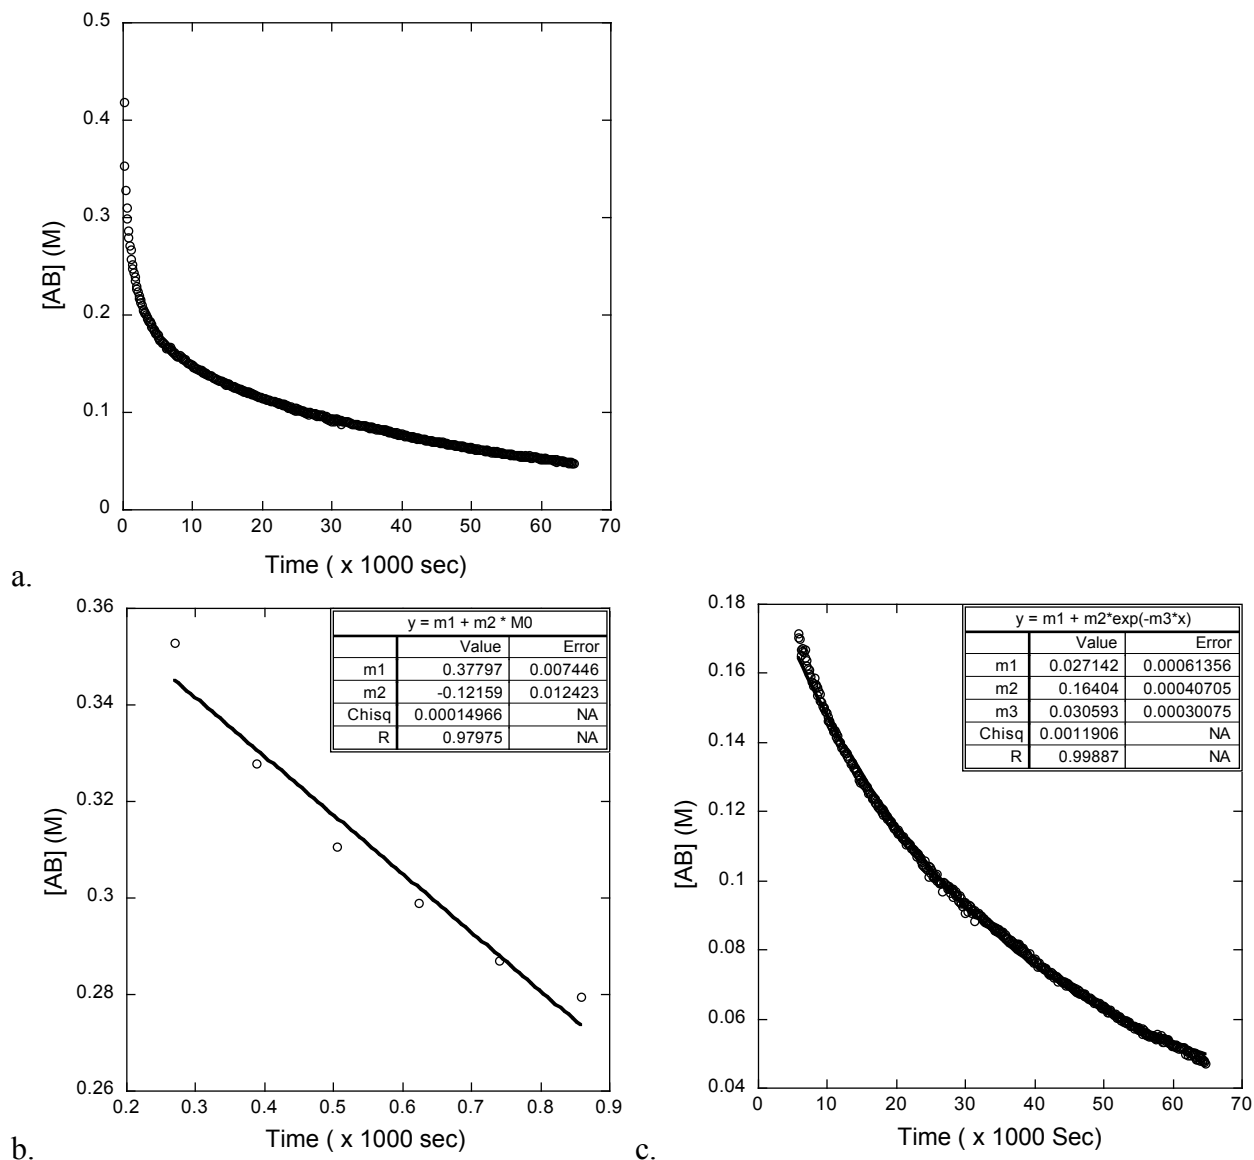

**Figure S5:** Kinetics for AB dehydrogenation catalyzed by **1** after catalyst/solvent system was exposed to air. Note similarity to reaction with no air exposure in Figure S3. (a). Entirety of graph. (b). Fast portion of dehydrogenation fitted linearly. (c) Slow portion of reaction fitted to exponential decay equation.

### III. Control Reactions of **1** with Borazine

See main text (experimental section) for procedures and the spectra of the reaction of **1** with borazine.

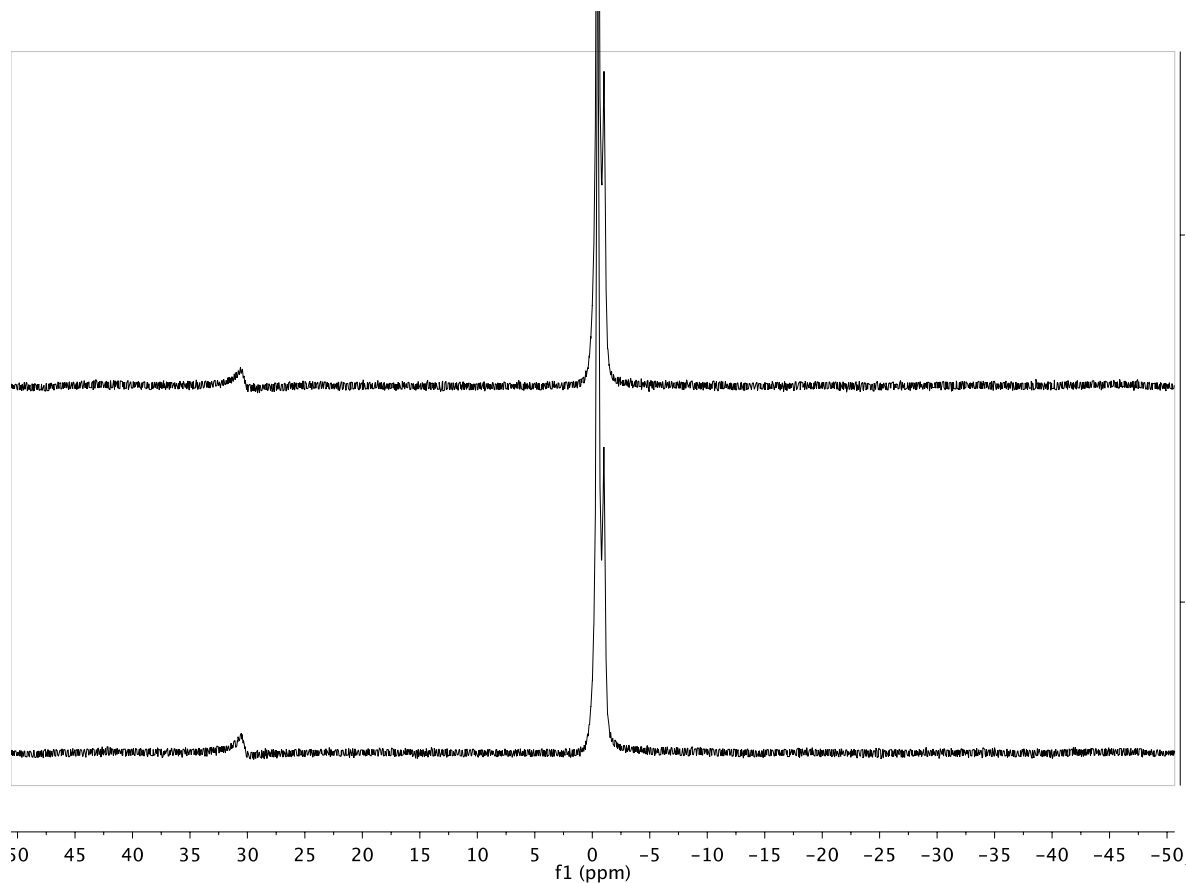

**Figure S6:** Control reaction of no catalyst **1**.  $^{11}\text{B}$  spectra borazine in diglyme/benzene- $d_6$ . Bottom: initial. Top: 24 hr in a 70 °C oil bath. 15% decrease based on peak height (31 ppm) relative to  $^{11}\text{B}$  standard. Boron external standard  $\text{BF}_3\text{-OEt}_2$  is at 0 ppm.



#### IV. Representative $^{11}\text{B}$ Spectra of AB Dehydrogenations

##### A. End of Reaction $^{11}\text{B}$ and $^1\text{H}$ Spectra for AB Dehydrogenation Catalyzed by **1**

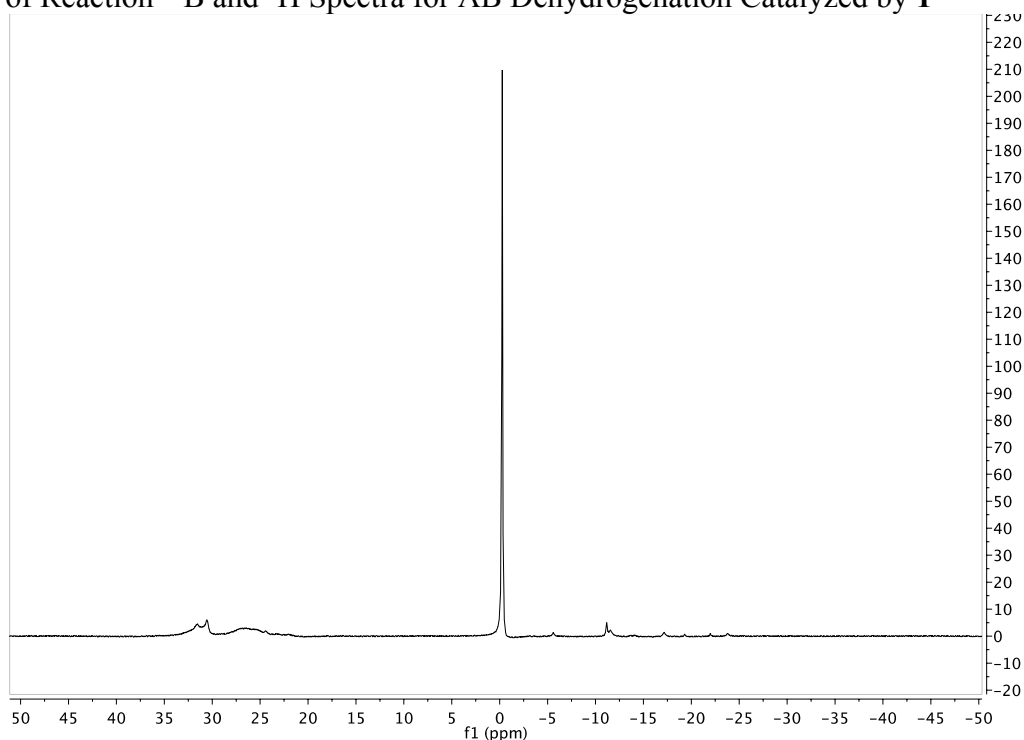

**Figure S7:**  $^{11}\text{B}$  spectra of end of AB dehydrogenation reaction catalyzed by **1** (10 mol% Ru, 1:2 benzene- $\text{d}_6$  : diglyme). Note presence of broad polyunsaturated peaks at 23-33 ppm. Other intermediates include borazine (31 ppm),  $\text{BF}_3\text{-OEt}_2$  external standard (0 ppm), amine borane cyclic tetramer (-5, -11, -23 ppm), cyclotriborazane (-11 ppm), residual AB (-22 ppm), and aminodiborane (-27 ppm).

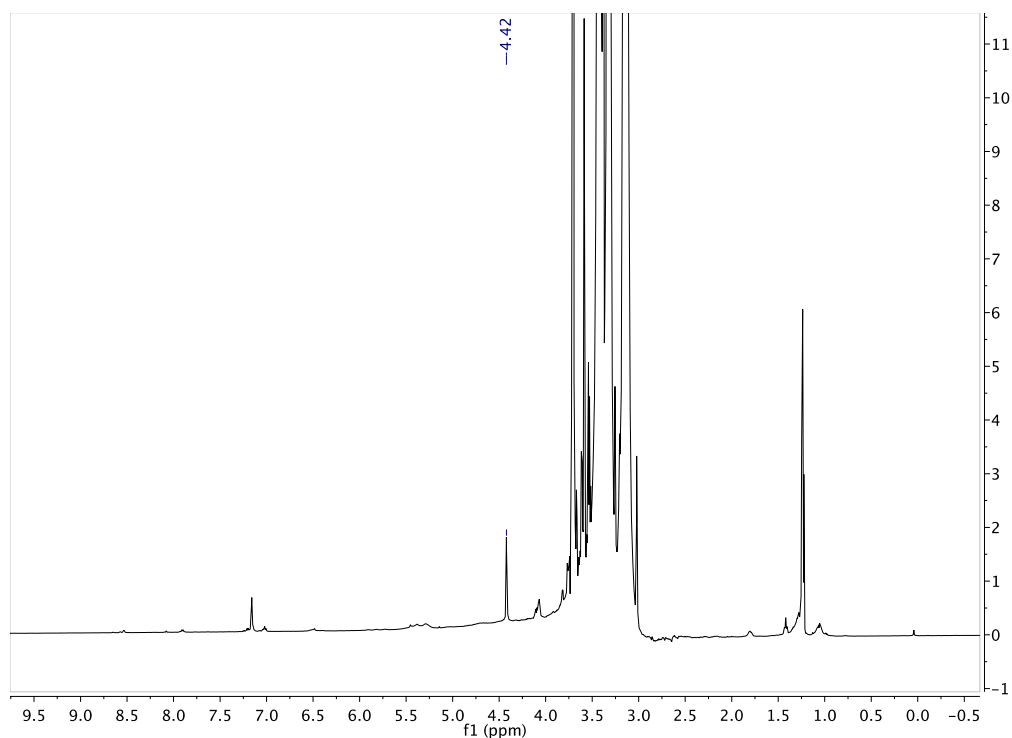

**Figure S8:**  $^1\text{H}$  spectra of end of AB dehydrogenation reaction catalyzed by **1**. Note  $\text{H}_2$  gas formation at 4.42 ppm.

B. End of Reaction  $^{11}\text{B}$  and  $^1\text{H}$  Spectra for AB Dehydrogenation Catalyzed by **1** After Catalyst Exposure to Air/Water

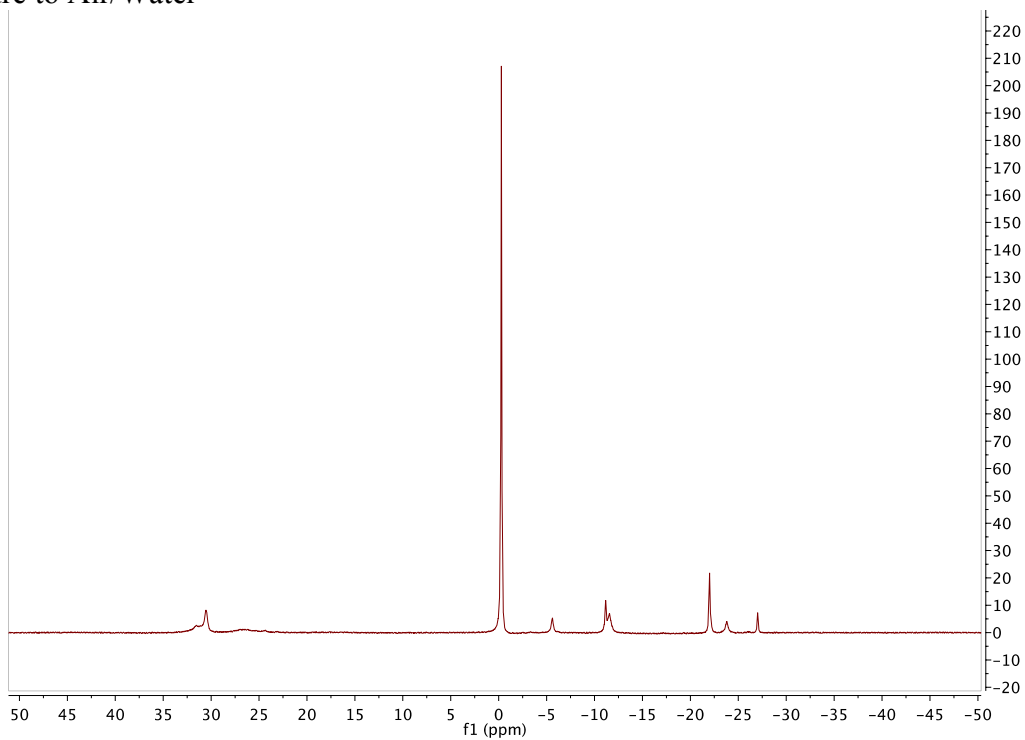

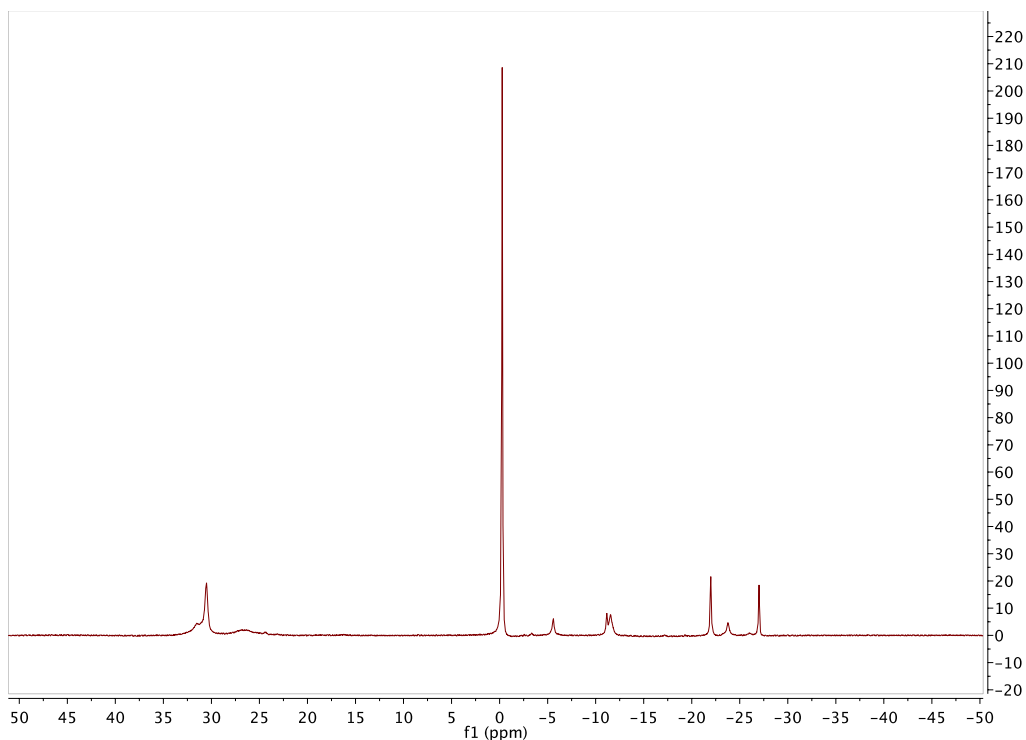

**Figure S9:** Top:  $^{11}\text{B}$  spectra of end of AB dehydrogenation reaction catalyzed by **1** (1 mol% Ru, 1:2 benzene- $\text{d}_6$  : diglyme) after **1** and solvents were exposed to air and sonicated for 20 min. Note presence of broad polyunsaturated peaks at 23-33 ppm. Other intermediates include borazine (31 ppm),  $\text{BF}_3\text{-OEt}_2$  external standard (0 ppm), amine borane cyclic tetramer (-5, -11, -23 ppm), cyclotriborazane (-11 ppm), residual AB (-22 ppm), and aminodiborane (-27 ppm). Bottom:  $^{11}\text{B}$  spectra of end of AB dehydrogenation reaction catalyzed by **1** (1 mol% Ru, 1:2  $\text{C}_6\text{D}_6$ : diglyme) The boron intermediates of the two spectra are comparable, no evidence of  $\text{B(OH)}_3$ , the hydrolysis of boron byproducts at 20 ppm.

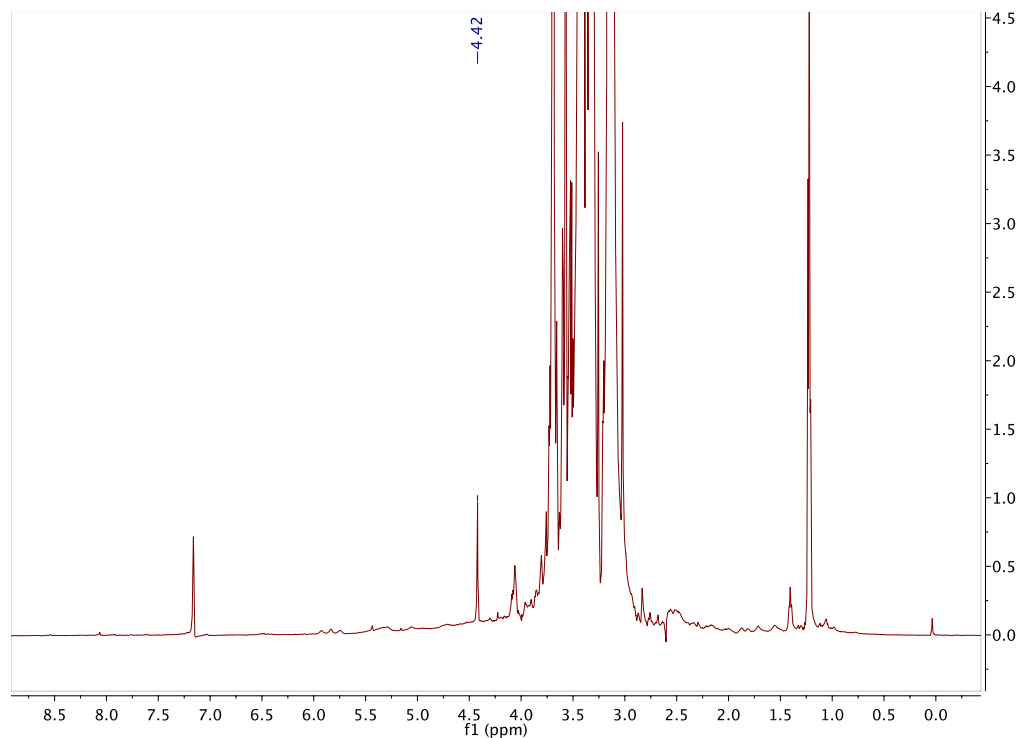

**Figure S10:**  $^1\text{H}$  spectra of end of AB dehydrogenation reaction catalyzed by **1** after **1** and solvents (diglyme/benzene- $d_6$ ) were exposed to air and submerged in an ultrasonic cleaning bath for 20 min. Note  $\text{H}_2$  gas formation at 4.42 ppm.

## V. Eudiometry

A. Catalyst **1** Reuse Reactions. See main text for in detail procedures.

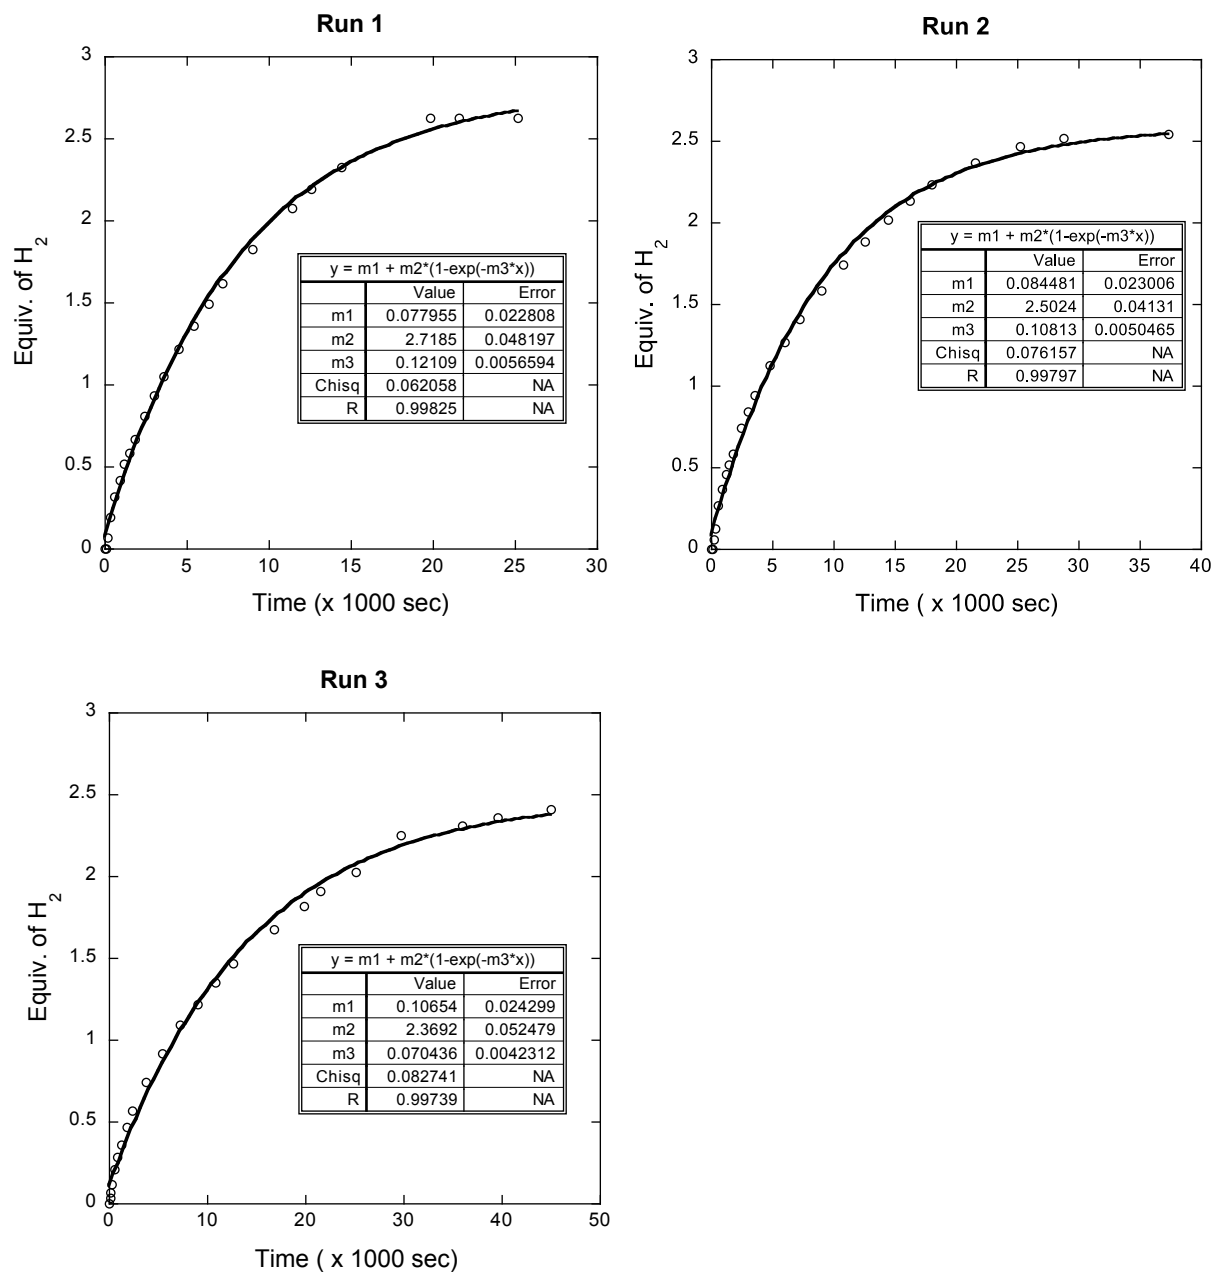

**Figure S11:** Eudiometry data for successive runs with 1.0 mol% catalyst **1** at 70 °C.

B. Representative H<sub>2</sub> quantification of [(phen)RuCl<sub>2</sub>(CO)<sub>2</sub>] (**2**) and 2 equivalents of TlOTf

AB dehydrogenation eudiometry run at 70 °C with 7.7 mg AB (0.25 mmol), **2** (10.2 mg, 25 μmol, 10 mol%), and TlOTf (17.7 mg, 50 μmol, 20 mol%) in diglyme (0.6 mL).

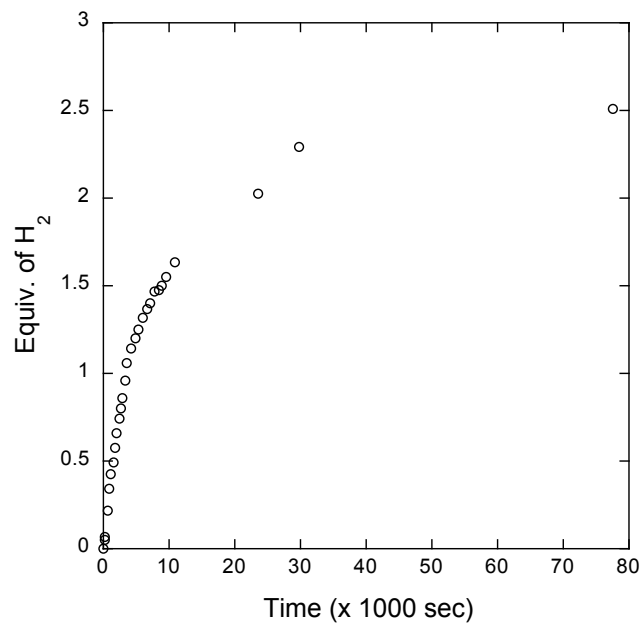

**Figure S12:** Eudiometry data for 10 mol% catalyst **2** and 2 equiv. TlOTf at 70 °C.

## VI. References

---

- <sup>1</sup> G. N. Krishnamurthy, N. Shashikala, *J. Serb. Chem. Soc.* 2009, **74**, 1085–1096.  
<sup>2</sup> D. Black, G. Deacon, N. Thomas, *Aust. J. Chem.* 1982, **35**, 2445-2453.
